# Supplementary material for: Protein kinase C coordinates histone H3 phosphorylation and acetylation
Source: eLife journal article supplement (doi:10.7554/elife.09886), 2015-10-15
Supplement: supp [file elife-09886-supp-v1.zip]

# **Supplementary Table S1; Yeast strains**

| Strain name              | Genotype                                                                                                                                    | Background | Reference/source           |
|--------------------------|---------------------------------------------------------------------------------------------------------------------------------------------|------------|----------------------------|
| W303-1a                  | <i>MATa ade2-1 trp1-1 can1-100 leu2-3,112 his3-11,15 ura3-1</i>                                                                             |            |                            |
| DZ2                      | <i>pGAL1-3HA-PKC1 Kan<sup>R</sup></i>                                                                                                       | W303-1a    | (Darieva et al., 2012)     |
| DK186                    | <i>MATa bar1</i>                                                                                                                            | W303-1a    | (Altman and Kellogg, 1997) |
| DK1690                   | <i>MATa pkc1-14::MX6</i>                                                                                                                    | W303-1a    | (Anastasia et al, 2012)    |
| DK1697                   | <i>MATa pkc1-21::MX6</i>                                                                                                                    | W303-1a    | (Anastasia et al, 2012)    |
| BY4741                   | <i>MATa his3Δ1 leu2Δ0 met15Δ0 ura3Δ0</i>                                                                                                    |            | EUROSCARF                  |
| Y01328( <i>bck1Δ</i> )   | <i>YJL095w::kanMX4</i>                                                                                                                      | BY4741     | EUROSCARF                  |
| Y01490( <i>rtt109Δ</i> ) | <i>YLL002w::kanMX4</i>                                                                                                                      | BY4741     | EUROSCARF                  |
| DZ5                      | <i>YLL002w::kanMX4 +pAS4104 (Rtt109(WT))</i>                                                                                                | BY4741     | This study                 |
| DZ6                      | <i>YLL002w::kanMX4 +pAS4105 (Rtt109(T46A))</i>                                                                                              | BY4741     | This study                 |
| DZ7                      | <i>YLL002w::kanMX4 +pAS4106 (Rtt109(T46D))</i>                                                                                              | BY4741     | This study                 |
| DZ8                      | <i>YLL002w::kanMX4 +pCM188</i>                                                                                                              | BY4741     | This study                 |
| RMY200                   | <i>MATa ade2-101(och) his3-Δ200 lys2-801(amb) trp1-Δ901 ura3-52 hht1, hhf1::LEU2 hht2,hhf2::HIS3 plus pRM200 (CEN4 ARS1 TRP1 HHT2 HHF2)</i> |            | (Xu et al., 2005)          |
| FXY19                    | RMY200 + pFX06 (HHT2-K56R)                                                                                                                  |            | (Xu et al., 2005)          |
| MSY748                   | <i>MATα lys2-128Δhis4-912Δ leu2-3,112 ura3-52 Δ(HHT1-HHF1) Δ(HHT2-HHF2)</i>                                                                 |            |                            |
|                          | pMS329 [URA3 HHT1 HHF1]                                                                                                                     |            | (Matsubara et al, 2007)    |
| H3-T45A                  | MSY748 [pRS315-HHT1(T45A)-HHF1]                                                                                                             |            | (Matsubara et al, 2007)    |
| DZ9                      | H3-T45A + pAS1995 (GFP-Pkc1)                                                                                                                |            | This study                 |
